# Supplementary material for: Hydrogenation of oxalic acid using light-assisted water electrolysis for the production of an alcoholic compound
Source: Royal Society of Chemistry journal article supplement (doi:10.1039/c6gc01135g), 2016-01-01
Supplement: c6gc01135g1.pdf [file c6gc01135g1.pdf]

1                                    **Electronic Supplementary Information**

2

3   **Hydrogenation of oxalic acid using light-assisted water electrolysis**  
4   **for the production of an alcoholic compound**

5

6 Sho Kitano<sup>a</sup>, Miho Yamauchi<sup>a\*</sup>, Shinichi Hata<sup>a</sup>, Ryota Watanabe<sup>a</sup>, Masaaki Sadakiyo<sup>a</sup>

7 <sup>a</sup>International Institute for Carbon-Neutral Energy Research (WPI-I2CNER),

8 Kyushu University, Motoooka 744, Nishi-ku, Fukuoka 819-0395, Japan.

9

10 CORRESPONDING AUTHOR

11 Prof. Miho Yamauchi

12 Phone: +81-92-802-6874. E-mail: yamauchi@i2cner.kyushu-u.ac.jp

13

14

## 1 Experimental section

### 2 Materials

3 The  $\text{WO}_3$  and  $\text{Ga}_2\text{O}_3$  powder were commercially supplied (Kanto Chemical Co., Japan), and  
4 JRC-TIO-7 and 8 (Japan Reference Catalyst of  $\text{TiO}_2$ , anatase-type  $\text{TiO}_2$  nanoparticles) were  
5 used as  $\text{TiO}_2$  samples. The  $\text{BiVO}_4$  sample was synthesized via a homogenous precipitation  
6 method.<sup>1</sup> Aqueous equivalent molar  $\text{Bi}(\text{NO}_3)_3 \cdot 5\text{H}_2\text{O}$  and  $\text{NH}_4\text{VO}_3$  solutions (0.8 mol/l)  
7 containing  $\text{HNO}_3$  (1.84 mol/l) were prepared separately, then two 100  $\text{cm}^3$  solutions were  
8 mixed and 15 g of urea was added. The mixed solution was stirred at 363 K for 8 h. The  
9  $\text{BiVO}_4$  precipitation formed by the hydrolysis was washed using water, filtered, and dried *in*  
10 *vacuo* at 25°C.

11

### 12 Preparation of electrodes

13 The photoanodes were prepared by using a squeegee method. A slurry of  $\text{Ga}_2\text{O}_3$ ,  $\text{BiVO}_4$  and  
14  $\text{WO}_3$  (sample: 0.1 g, water: 0.5 ml, acetylacetone: 0.03 ml, Toriton-X: 0.03 ml) was coated  
15 onto a conductive glass (F-doped  $\text{SnO}_2$ , 10  $\Omega/\text{cm}^2$ , 2×2 cm), and the electrodes were calcined  
16 at 450 °C for 4 h under air. For the  $\text{TiO}_2$  cathodes, Ti foils (2×2 cm) were used after  
17 calcination at 450 °C for 0.5 h under air flow. A suspension of  $\text{TiO}_2$  samples (10 mg) in  
18 methanol (0.2 ml) was applied to Ti foil, and then, the sample-modified Ti foils were calcined  
19 at 500°C for 5 h or 450°C for 0.5 h under flowing air.

20

### 21 Characterization

22 XRD measurements were conducted using SmartLab (Rigaku) with  $\text{Cu-K}\alpha$  radiation ( $\lambda =$   
23 1.54059 Å) at 45 kV and 200 mA. UV-visible spectra were recorded on a V-670 spectrometer  
24 (JASCO). The diffuse reflection spectra were converted into reflectance spectra using the  
25 Kubelka-Munk function.

26

## 1 Electrochemical measurement

2 All of the chemicals used for electrochemical experiments were purchased from Wako  
3 Pure Chemical Industries, Ltd. The electrochemical experiments were conducted by  
4 employing a two or three-electrode system connected to a VersaSTAT4 potentiostat  
5 (AMETEC, Princeton Applied Research). In the two-electrode system, the prepared TiO<sub>2</sub>  
6 cathode (JRC-TIO-7 or JRC-TIO-8) and oxide photoanodes, as well as a two-compartment  
7 electrochemical cell (75 ml volume for each), were used. Electrolyte aqueous solutions  
8 (cathode: 40 ml of 0.16 or 0.03 M **OX** and 0.16 or 0.2 M Na<sub>2</sub>SO<sub>4</sub>, anode: 0.16 or 0.2 M  
9 Na<sub>2</sub>SO<sub>4</sub>) were introduced into the cells. A piece of proton conducting membrane (Nafion®,  
10 NRE-212, Sigma-Aldrich) was used as a separator, and each electrode was placed inside the  
11 cathode and anode cell. After the Teflon caps were tightly closed, Ar gas was bubbled both in  
12 cathode and anode cells for 30 min to purge the air from the cells. A 300 W Xe lamp with a  
13 cut filter was applied as a light source. Bias between the working electrode and counter  
14 electrode was applied from 0 V to 2.5 V at 25°C or 50°C in the dark or under light irradiation  
15 ( $\lambda > 200, 300$  and  $400$  nm) to photoanodes in the anode cell with light shielding of the  
16 cathode cell. Chronoamperometric electro-reduction of **OX** to GO and **GC** was conducted by  
17 employing the TiO<sub>2</sub> cathode (JRC-TIO-7) and a Ag/AgCl reference electrode (RE-1B, BAS)  
18 in **OX** solution (pH 1.0, 40 ml, 0.03 M **OX**, 0.2 M Na<sub>2</sub>SO<sub>4</sub>) and the WO<sub>3</sub> photoanode in  
19 Na<sub>2</sub>SO<sub>4</sub> solution (pH 5.6, 40 ml, 0.2 M) while applying an external bias of 1.0 or 1.5 V  
20 between the cathode and anode at 50°C for 2 h under irradiation of UV-visible light with  $\lambda >$   
21  $300$  nm or visible light with  $\lambda > 400$  nm, or in the dark. The potential difference between the  
22 TiO<sub>2</sub> cathode and reference electrode was measured using a multimeter (CDM-2000D,  
23 CUSTOM Co.) to determine the cathode potential during the reaction as described in Fig. S6.  
24 The reaction solution (50  $\mu$ l) was collected from the cathode cell and analyzed by using the  
25 HPLC. The gas products were measured using gas chromatograph (GC-8A, Shimadzu).  
26 In the three-electrode system, the prepared TiO<sub>2</sub> cathode (JRC-TIO-7), a coiled Pt wire

1 (230×0.5 mm, BAS) and an Ag/AgCl electrode were used as a working, counter and reference  
2 electrode, respectively. The electrochemical reduction of **OX** at a constant potential, i.e.,  
3 chronoamperometry (CA), was performed in the same cell as that in the two-electrode system.  
4 Electrolyte aqueous solutions (cathode: 40 ml of 0.16 or 0.03 M **OX** and 0.16 or 0.2 M  
5 Na<sub>2</sub>SO<sub>4</sub>, anode: 0.16 or 0.2 M Na<sub>2</sub>SO<sub>4</sub>) were introduced into the cells. The working/reference  
6 and counter electrodes were placed inside the cathode and anode cell, respectively. The pH  
7 value of the electrolyte solution in the cells was adjusted by adding H<sub>2</sub>SO<sub>4</sub> or NaOH solution.  
8 After the Teflon caps were tightly closed, Ar gas was bubbled both in cathode and anode cells  
9 for 30 min to purge the air from the cells. **OX** electrochemical reductions were conducted by  
10 controlling the working electrode potential at 50°C. Potentials impressed on the working  
11 electrode were measured against a reference electrode and converted to the RHE reference  
12 scale using the following equation:  $E$  (versus RHE) =  $E$  (versus Ag/AgCl) + 0.199 V + 0.059  
13 V × pH. The reaction solution was analyzed using the same procedure as for the two-electrode  
14 system. Chemical activators were not used in this study because the TiO<sub>2</sub> cathode stably  
15 worked during the reactions. We demonstrated **OX** reduction experiments both under light  
16 irradiation and in the dark to elucidate effects of light irradiation on the applied bias using the  
17 identical TiO<sub>2</sub> catalyst, TIO-7, except for the experimental results shown in Fig. 2.

18

19

## 20 **Definitions of Faradaic efficiency**

21 Faradaic efficiencies in electro-reduction experiments were defined using the following  
22 equation:

$$23 \text{ Faradaic efficiency (\%)} = \frac{m_{\text{products}} \times n \times F}{Q} \times 100,$$

24 where  $m_{\text{products}}$  is the moles of the reduction products;  $n$  represents the number of electrons  
25 required for the formation of GO and **GC** from **OX** ( $n = 2$  and  $4$  for the formation of GO and  
26 **GC**, respectively);  $F$  is the Faradaic constant (96485 C/mol of electrons);  $Q$  is the total charge

1 in Coulombs passed across the electrode during the electrolysis.

2

### 3 **References**

4 1. J. Q. Yu and A. Kudo, *Adv. Funct. Mater.*, 2006, **16**, 2163-2169.

5

6

1

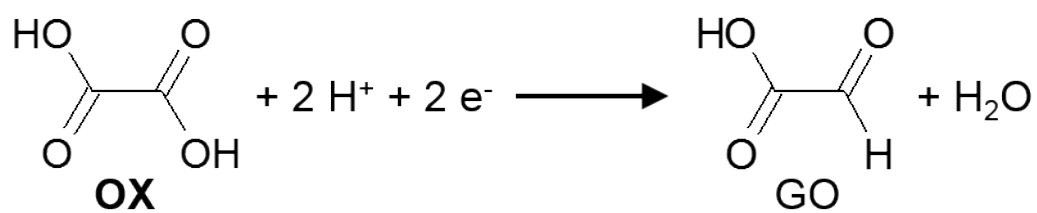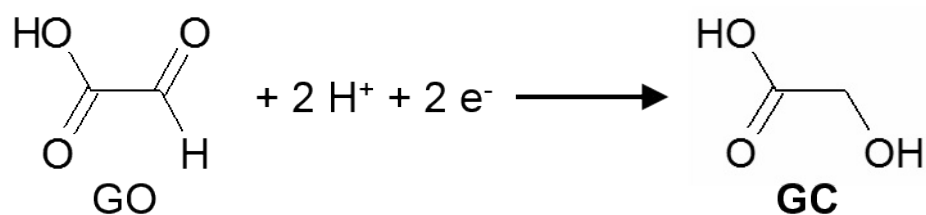

2

3

**Scheme S1** Consecutive electroreduction of **OX** to **GC**.

4

1

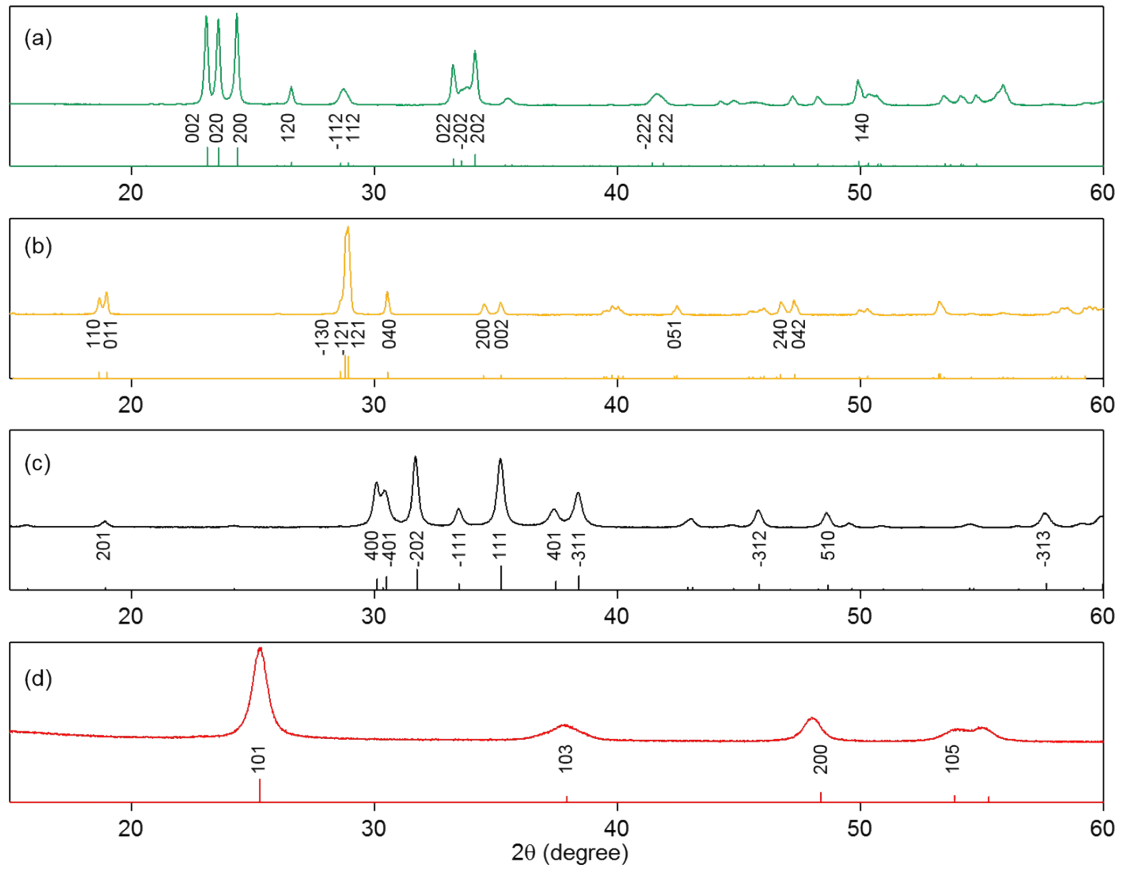

2

3

4 **Fig. S1** XRD patterns of (a) WO<sub>3</sub>, (b) BiVO<sub>4</sub>, (c) Ga<sub>2</sub>O<sub>3</sub>, and (d) TiO<sub>2</sub> (TIO-8), which are  
5 used as catalysts for **OX** reduction and water oxidation. Solid vertical lines indicate  
6 diffraction angles from (a) an anatase-type TiO<sub>2</sub> (JCPDF card file 01-0562), (b) a monoclinic  
7 WO<sub>3</sub> (JCPDF card file 43-1035), (c) a monoclinic BiVO<sub>4</sub> (JCPDF card file 14-0688), (d) a  
8 monoclinic β-Ga<sub>2</sub>O<sub>3</sub> (JCPDF card file 87-1901).

9

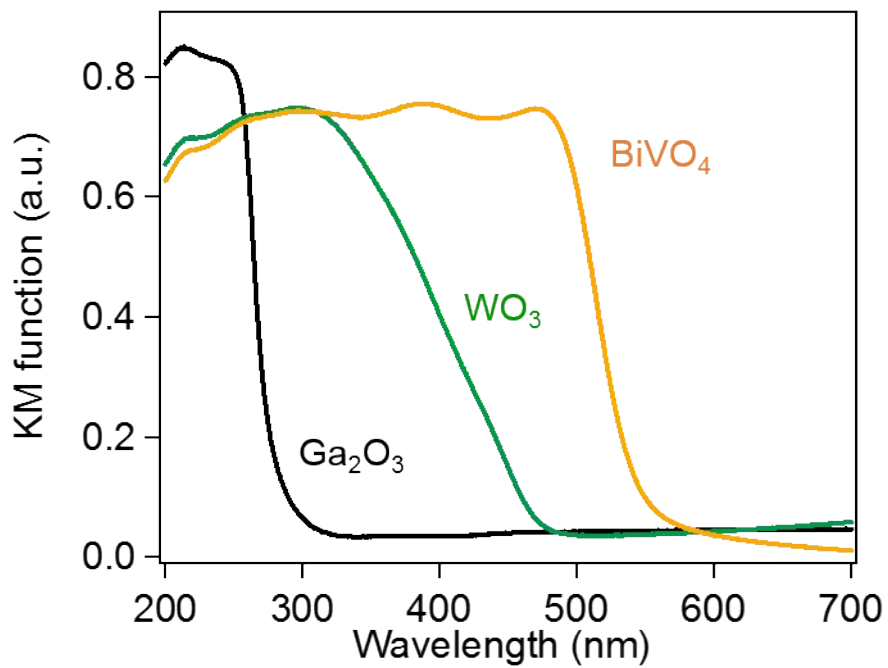

1

2 **Fig. S2** Photoabsorption spectra of Ga<sub>2</sub>O<sub>3</sub> (black), WO<sub>3</sub> (green) and BiVO<sub>4</sub> (orange).

3

4

5



1  
2  
3  
4  
5  
6  
7  
8  
9  
10  
11  
12  
13  
14  
15  
16  
17  
18  
19  
20

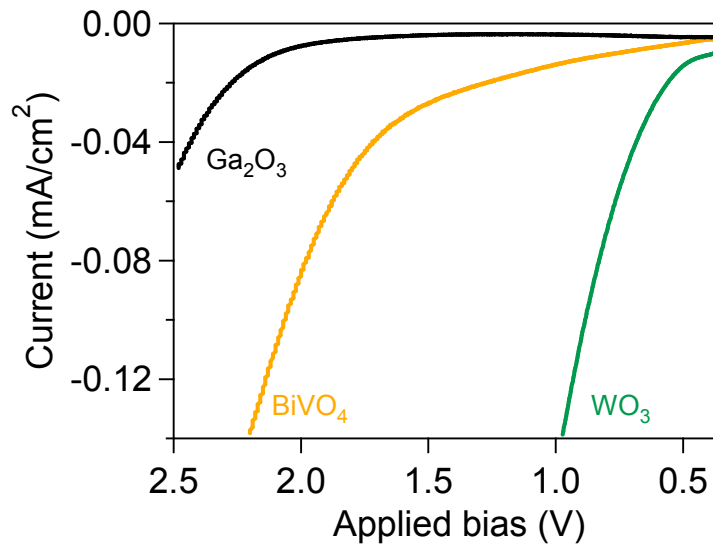

**Fig. S3** Current-voltage curves of electro-reduction of **OX** using a two-electrode system comprising a TiO<sub>2</sub> (JRC-TIO-8) cathode in solution containing **OX** (0.16 M) and a Na<sub>2</sub>SO<sub>4</sub> solution (pH 1.2, 40 ml, 0.16 M) and Ga<sub>2</sub>O<sub>3</sub>, BiVO<sub>4</sub> and WO<sub>3</sub> photoanodes in a Na<sub>2</sub>SO<sub>4</sub> solution (pH 5.8, 40 ml, 0.16 M) under irradiation of UV-visible light ( $\lambda > 200$  nm) at 25 °C.

1

2

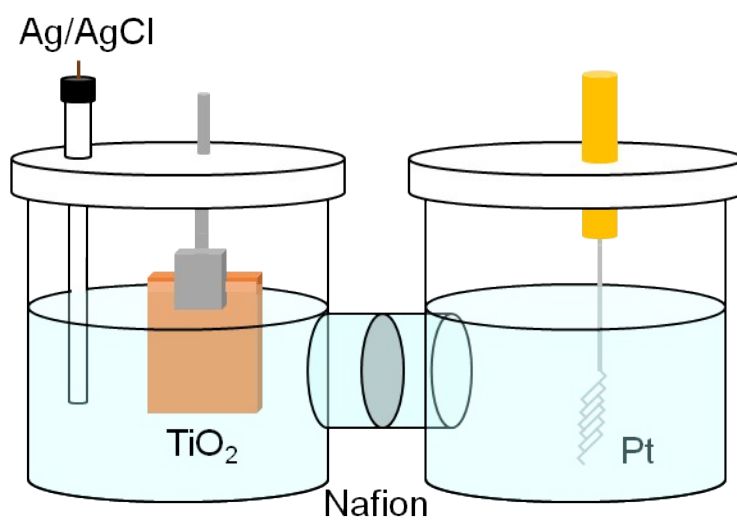

3

4 **Fig. S4** The three-electrode electrochemical system comprising a TiO<sub>2</sub> cathode, Pt anode and  
5 an Ag/AgCl reference electrode.

6

1

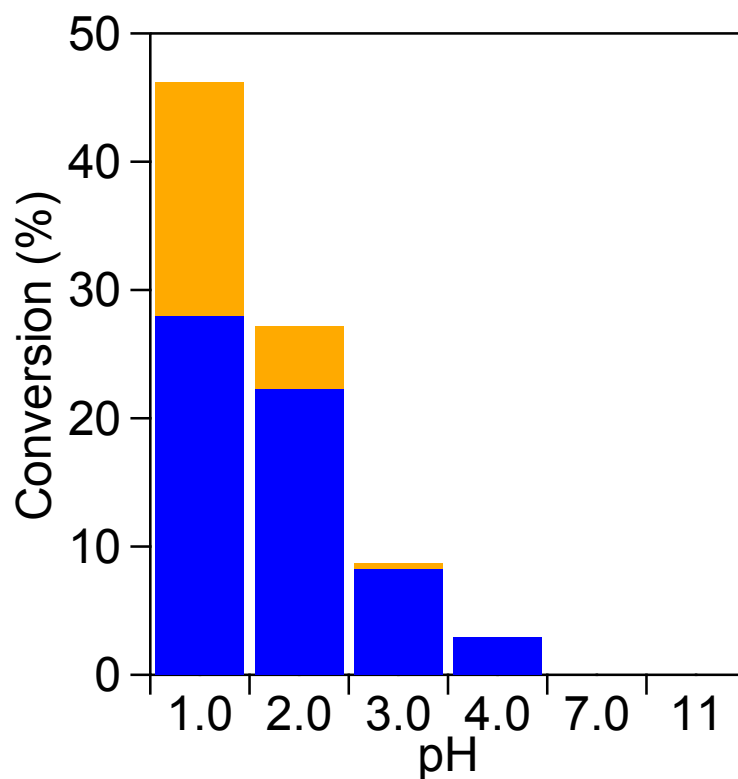

2

3 **Fig. S5** Influence of pH value on distribution of GO (orange) and GC (blue) in electro-  
4 reduction of **OX** using the three-electrode system comprising a TiO<sub>2</sub> cathode (JRC-TIO-7), a  
5 Pt wire as the counter anode and Ag/AgCl as the reference electrode at 50°C for 2 h. The  
6 cathode and anode solution contained 0.2 M Na<sub>2</sub>SO<sub>4</sub> and the cathode solution contained 0.03  
7 M **OX**, the pH of which was controlled by using an H<sub>2</sub>SO<sub>4</sub> or NaOH solution.

8

9

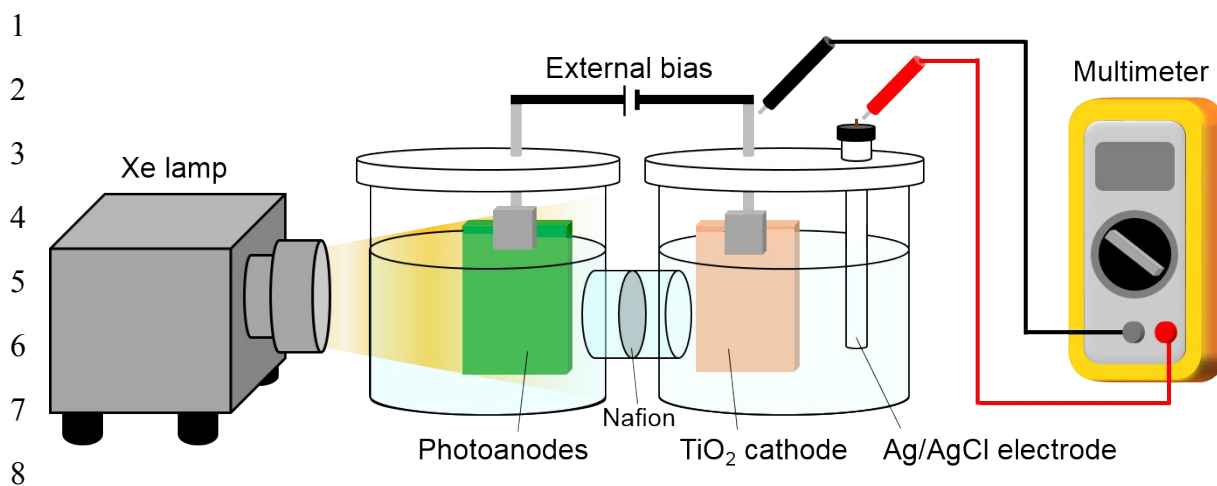

9 **Fig. S6** Illustration of the two-electrode electrochemical system employing a TiO<sub>2</sub> cathode, a  
10 photoanode and a Ag/AgCl reference electrode. External bias was applied between the TiO<sub>2</sub>  
11 cathode and photoanodes under light irradiation from a Xe lamp or in the dark. The Potential  
12 of the TiO<sub>2</sub> cathode referred to that of the Ag/AgCl reference electrode during the reaction  
13 was measured using a multimeter.

14  
15  
16  
17  
18  
19

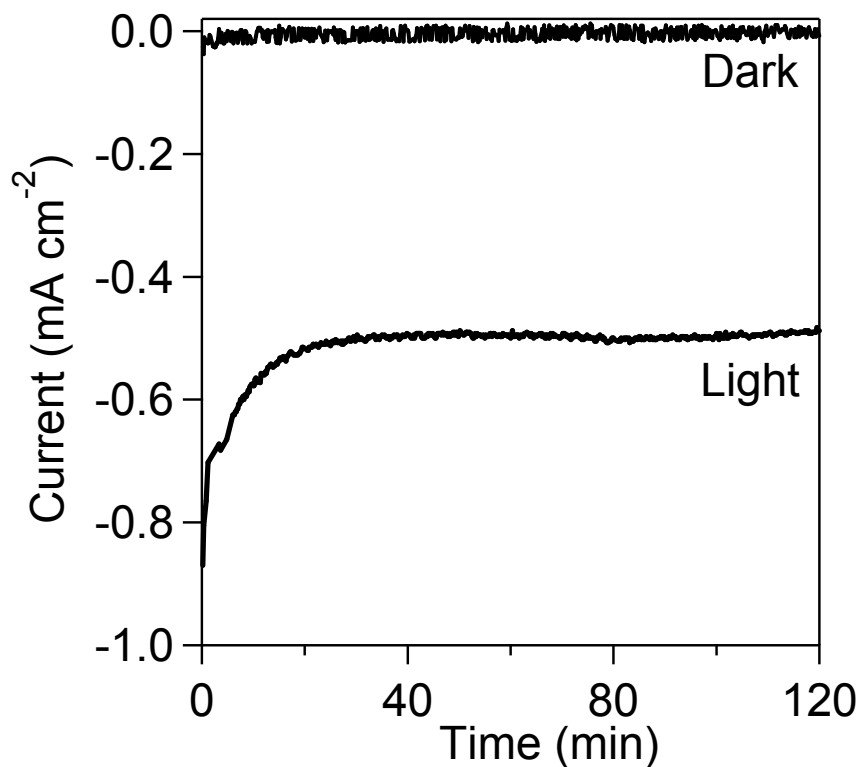

1

2 **Fig. S7** Time courses of reductive current in electro-reduction of **OX** while applying an  
3 external bias of 1.5 V under the irradiation of UV-visible light ( $\lambda > 300$  nm) or in the dark.  
4 The experiment was conducted using a two-electrode system comprising a TiO<sub>2</sub> cathode in  
5 **OX** solution (pH 1.0, 40 ml, 0.03 M of **OX**, 0.2 M Na<sub>2</sub>SO<sub>4</sub>) and a WO<sub>3</sub> photoanode in  
6 Na<sub>2</sub>SO<sub>4</sub> solution (pH 5.6, 40 ml, 0.2 M) at 50°C.

7

8

9

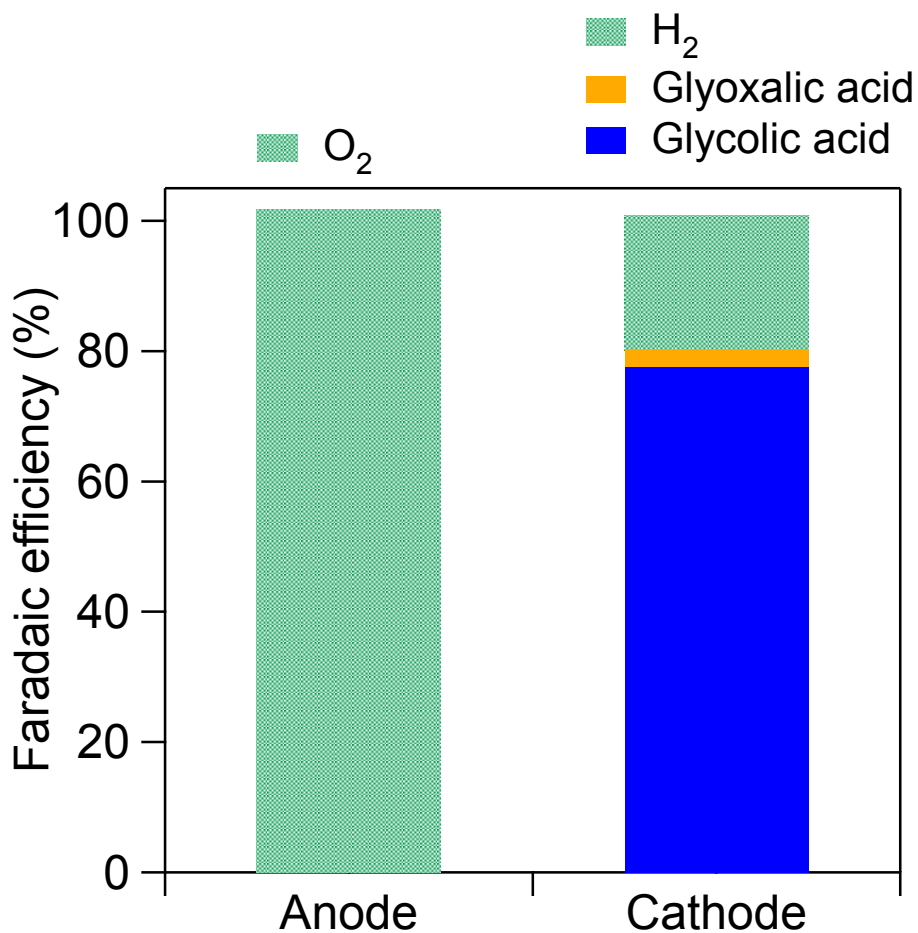

1

2 **Fig. S8** Faradaic efficiencies based on the amount of GO, GC and H<sub>2</sub> formed in the cathode  
 3 cell and O<sub>2</sub> formed by water oxidation in the anode cell when applying a bias of 1.5 V under  
 4 the irradiation of UV-visible light ( $\lambda > 300$  nm). The experiment was conducted using a two-  
 5 electrode system comprising a TiO<sub>2</sub> cathode in **OX** solution (pH 1.0, 40 ml, 0.03 M of **OX**,  
 6 0.2 M Na<sub>2</sub>SO<sub>4</sub>) and a WO<sub>3</sub> photoanode in Na<sub>2</sub>SO<sub>4</sub> solution (pH 5.6, 40 ml, 0.2 M) at 50°C for  
 7 2 h.

8

9

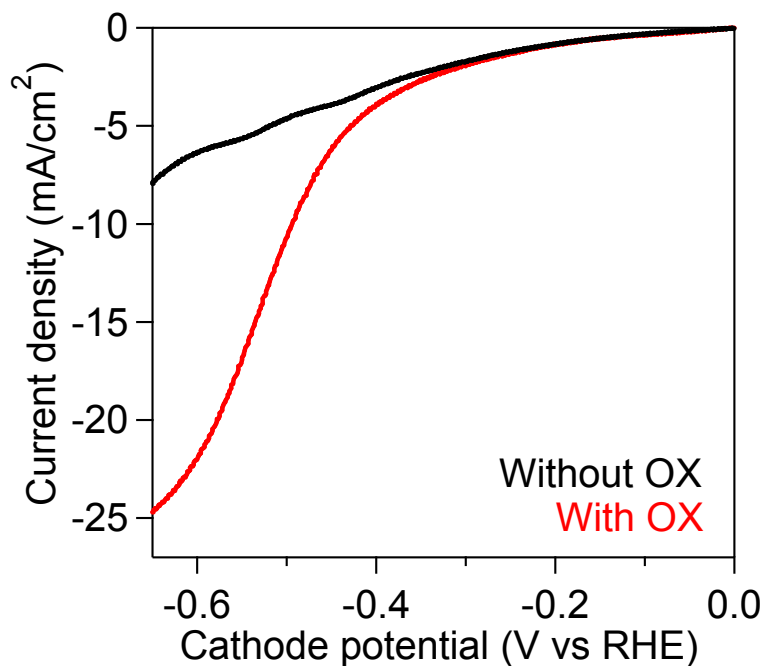

1  
2  
3  
4  
5  
6  
7  
8  
9  
10  
11  
12  
13  
14  
15  
16  
17  
18  
19

**Fig. S9** Cyclic voltammogram curves measured using a three-electrode system employing a TiO<sub>2</sub> cathode, Pt anode and Ag/AgCl reference electrode in the dark. Red and black curves present reduction currents recorded in electrolyte solutions with and without the **OX** substrate, respectively. The electrochemical experiments were conducted in **OX** solution (pH 1.0, 80 ml, 0.03 M of **OX**, 0.2 M Na<sub>2</sub>SO<sub>4</sub>) or blank Na<sub>2</sub>SO<sub>4</sub> solution (pH 1.0, 80 ml, 0.2 M) at 50°C.

1

**Table S1** Yields and reaction rates for **OX** reduction reported in this work and others.

| Report                                        | Yields (%) | Reaction rate ( $\mu\text{mol h}^{-1}$ ) |
|-----------------------------------------------|------------|------------------------------------------|
| This work (Two-electrode system) <sup>a</sup> | 2.2        | 16                                       |
| Previous work ref. 32                         | 31         | 230                                      |
| (Three-electrode system) <sup>b</sup>         |            |                                          |
| Ref. 12                                       | 19         | 99-100                                   |
| Ref. 13                                       | 5.0-76     | 18-2900                                  |
| Ref. 14                                       | 41-95      | 8.5-20                                   |
| Ref. 15                                       | 34-100     | 14-42                                    |

2 a: The experiment was demonstrated when applying a bias of 1.5 V under irradiation of UV-  
3 vis light.

4 b: The experiment was demonstrated using the highly active porous TiO<sub>2</sub> catalyst as a cathode,  
5 Pt anode and Ag/AgCl reference electrode in the dark. The applied potential at the cathode  
6 was -0.7 V vs RHE.

7

8
